# Supplementary material for: Transpirational demand affects aquaporin expression in poplar roots
Source: PubMed Central journal article supplement — J Exp Bot. 2013 Apr 18;64(8):2283–93. doi: 10.1093/jxb/ert096 (PMC3654427; doi:10.1093/jxb/ert096), 2013-04-18
Supplement: supp_ert096_jexbot095026_file001.pdf [file supp_ert096_jexbot095026_file001.pdf]

Supplementary material for on-line publication

**Supplemental Fig. S1. Phylogenetic relationships of plasma membrane intrinsic proteins (PIPs) in *Arabidopsis thaliana*, *Oryza sativa* and *Populus trichocarpa*.**

The phylogenetic tree was constructed using Genomics Workbench version 5.5 (CLC Bio, Cambridge, MA, USA) and the Unweighted Pair Group Method with Arithmetic Mean (UPGMA) method. The tree was visualized by FigTree (tree.bio.ed.ac.uk/software/figtree/). The scale bar represents the number of amino acid substitutions per site.

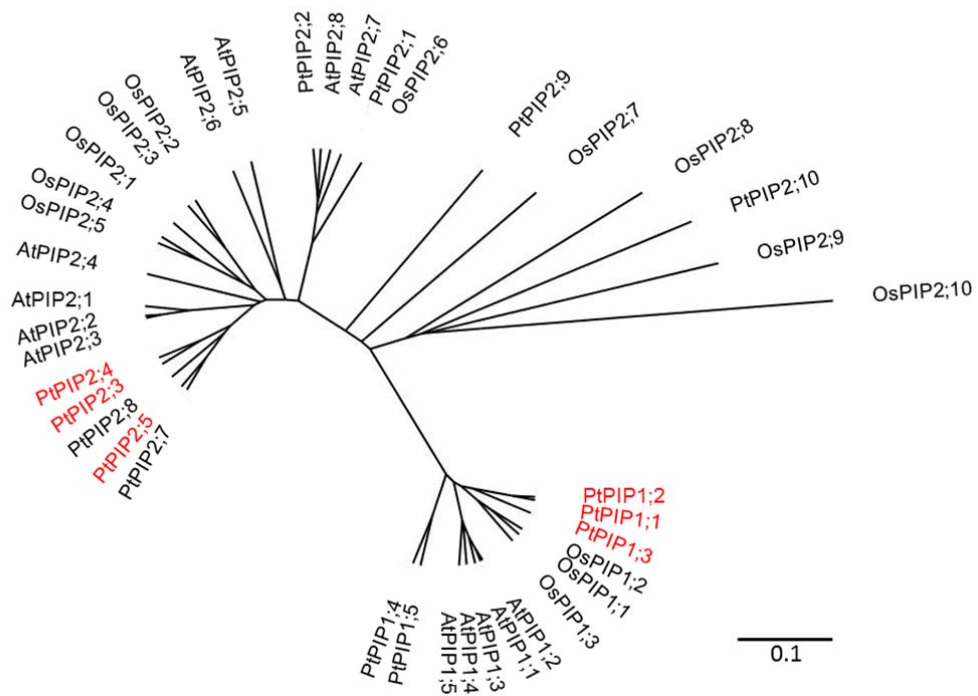

**Supplemental Fig. S2. Effect of step changes light and humidity on transpiration rate ( $E$ ).** (A) Transpiration rate of control plants ('Light control'). (B) Transpiration rate of shaded plants ('Shade'), of plants removed from shade after 4 h ('Light increase, 4h'), and of plants removed from shade after 28 h ('Light increase, 28h'). (C) Transpiration rate of plants grown at high relative humidity (RH) after a step change in RH. Transpiration was measured 5 minutes ('RH decrease, 5 min'), 4 h ('RH decrease, 4h'), and 28 h ('RH decrease, 28h') after the decrease in humidity. Data shows means  $\pm$  SE;  $n = 5$  plants. Significant differences are indicated by unique letters ( $P \leq 0.05$ ).

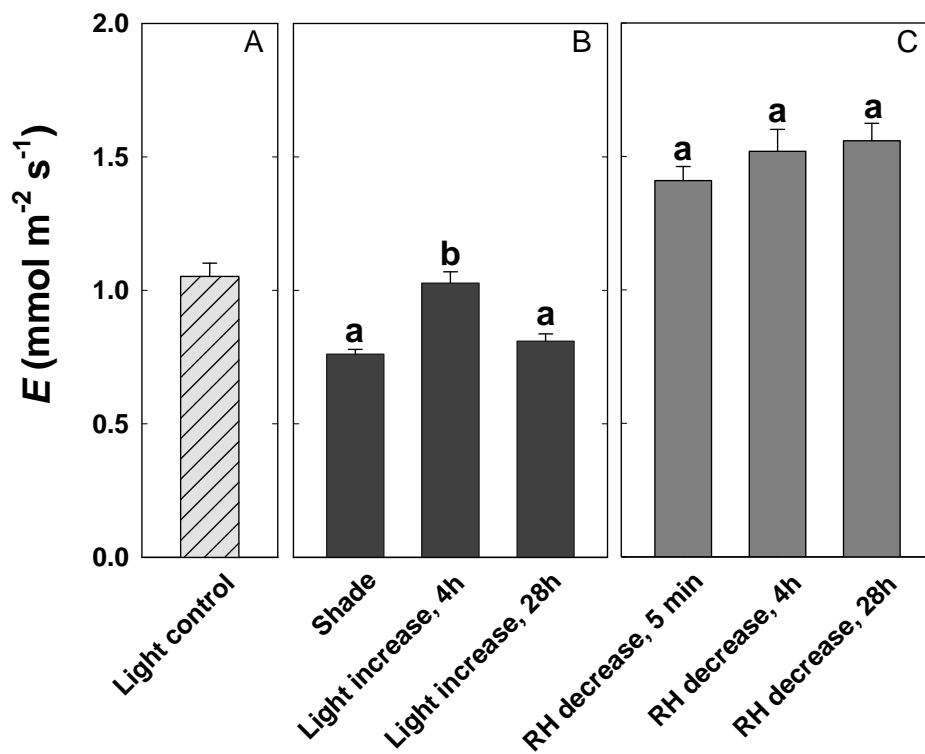

**Table S1. Summary of PIP expression patterns.** The poplar gene names follow the nomenclature of Gupta and Sankararamakrishnan (2009). Findings from a previous experiment (Almeida-Rodriguez *et al.* 2011) are summarized as: \* for differentially expressed genes; *nd* for non-differentially expressed genes; blank spaces indicate genes that were not investigated. The *Populus* eFP browser (Wilkins *et al.* 2009) was used to check the tissue specificity of PIPs as well as putative regulation by light in seedlings. Relative transcript abundance of a particular gene is indicated as a fold change ratio between the tissue specific probe signal normalized to the control signal (value=1) as indicated in the eFP Browser. Grey background highlights the genes used in this present study.

| <i>P. trichocarpa</i> gene name |                  |                          | Almeida-Rodriguez<br><i>et al.</i> (2011) |           | Poplar eFP Browser - Wilkins <i>et al.</i> (2009) |       |       |                       |           |
|---------------------------------|------------------|--------------------------|-------------------------------------------|-----------|---------------------------------------------------|-------|-------|-----------------------|-----------|
|                                 |                  |                          | -----Root tips -----                      |           | ----- Mature tissue -----                         |       |       | ----- Seedlings ----- |           |
| Gene name                       | Phytozome v2.0   | Affymetrix probe ID      | Acclimation                               | Dynamic   | Leaf                                              | Root  | Xylem | Dark grown            | +3h light |
| <i>PtPIP1;1</i>                 | POPTR_0010s19930 | PtpAffx.7686.1.S1_a_at   | *                                         |           | 0.24                                              | 1.16  | 0.25  | 1.15                  | 1.04      |
| <i>PtPIP1;2</i>                 | POPTR_0008s06580 | Ptp.4455.1.S1_s_at       | *                                         | *         | 0.09                                              | 2.06  | 0.14  | 1.4                   | 1.87      |
| <i>PtPIP1;3</i>                 | POPTR_0003s12870 | PtpAffx.12342.2.S1_s_at  |                                           |           | 0.13                                              | 0.87  | 1.89  | 0.74                  | 0.65      |
| <i>PtPIP1;4</i>                 | POPTR_0006s09920 | PtpAffx.54577.1.S1_at    | *                                         | *         | 0.13                                              | 1.26  | 2.09  | 0.52                  | 0.84      |
| <i>PtPIP1;5</i>                 | POPTR_0016s12070 | PtpAffx.2848.1.S1_a_at   | *                                         |           | 0.13                                              | 0.8   | 1.87  | 0.12                  | 0.24      |
| <i>PtPIP2;1</i>                 | POPTR_0009s13890 | PtpAffx.5465.1.A1_x_at   |                                           | *         | 0.18                                              | 1.18  | 1.58  | 1.13                  | 0.93      |
| <i>PtPIP2;2</i>                 | POPTR_0004s18240 | PtpAffx.5465.2.A1_x_at   | <i>nd</i>                                 | <i>nd</i> | 0.05                                              | 1.13  | 4.1   | 1.05                  | 0.58      |
| <i>PtPIP2;3</i>                 | POPTR_0010s22950 | Ptp.1588.1.S1_s_at       | *                                         | *         | 0.05                                              | 0.9   | 4.42  | 0.83                  | 0.52      |
| <i>PtPIP2;4</i>                 | POPTR_0008s03950 | PtpAffx.249.108.A1_x_at  | *                                         | *         | 0.2                                               | 0.96  | 0.11  | 1.04                  | 1.29      |
| <i>PtPIP2;5</i>                 | POPTR_0006s12980 | PtpAffx.7681.3.A1_x_at   |                                           | *         | 0.28                                              | 12.52 | 1.68  | 7.25                  | 6.88      |
| <i>PtPIP2;7</i>                 | POPTR_0016s09090 | Ptp.139.1.S1_at          | <i>nd</i>                                 | <i>nd</i> | 0.03                                              | 12.46 | 3.31  | 0.85                  | 2.96      |
| <i>PtPIP2;8</i>                 | POPTR_0009s01940 | PtpAffx.5992.1.S1_at     |                                           |           | 0.02                                              | 10.31 | 1.46  | 1.19                  | 1.25      |
| <i>PtPIP2;9</i>                 | POPTR_0005s11110 | PtpAffx.221954.1.S1_at   |                                           |           | 0.28                                              | 0.04  | 0.03  | 1.21                  | 1.1       |
| <i>PtPIP2;10</i>                | POPTR_0005s11100 | PtpAffx.221953.1.S1_s_at |                                           | *         | 0.08                                              | 0.26  | 0.09  | 4.85                  | 1.38      |

**Table S2. Primer sequences used for the gene expression study.** Primers were designed based on *Populus trichocarpa* reference gene sequences. Primer sequences of the selected candidate genes are represented as well as the specific amplicon length.

| <i>P. trichocarpa</i> gene Name |                  | Amplicons                 |                          |             |
|---------------------------------|------------------|---------------------------|--------------------------|-------------|
| Gene name                       | Phytozome v2.0   | Forward Primer (5'→3')    | Reverse Primer (5'→3')   | Length (bp) |
| <i>PtPIP1;1</i>                 | POPTR_0010s19930 | TGCAGAGTTCATGGCCACCTTC    | TCGTGTCCTTAAACACGCCCATC  | 74          |
| <i>PtPIP1;2</i>                 | POPTR_0008s06580 | TGGCCTTGGTGCTGAGATTGTC    | GCACTACGCTTGGCATCAGTTG   | 78          |
| <i>PtPIP1;3</i>                 | POPTR_0003s12870 | AACTGGCATTAAACCCGGCAAGG   | AATGGGCAACCCAGAAGATCCAG  | 96          |
| <i>PtPIP2;3</i>                 | POPTR_0010s22950 | AGTCTGGGAGCCGCTGTATCTAC   | GGGTCCAACCCAGAAGATCCAATG | 72          |
| <i>PtPIP2;4</i>                 | POPTR_0008s03950 | GTCATTGAGGAGCAACCCGAATGTC | CCATCATGCACGCACAAGCACTC  | 81          |
| <i>PtPIP2;5</i>                 | POPTR_0006s12980 | TGTGTTGGCACCCTTCCCATC     | GTCATCCCATGCCTTGTCTTCGT  | 139         |
